# Supplementary material for: Implementation of national antenatal hypertension guidelines: a multicentre multiple methods study
Source: PubMed Central journal article supplement (PMC7590365; doi:10.1136/bmjopen-2019-035762), 2020-10-23
Supplement: bmjopen-2019-035762supp001.pdf [file bmjopen-2019-035762supp001.pdf]

## Supplementary file 1

## Chronic hypertension in pregnancy – healthcare professional survey

| Respondents                                                                                  | Number (97) | Percentage % |
|----------------------------------------------------------------------------------------------|-------------|--------------|
| Obstetrician                                                                                 | 69          | 71.1         |
| Of which are consultants                                                                     | 53          | 55           |
| Midwife                                                                                      | 28          | 28.9         |
| Of which are specialist/ senior midwife                                                      | 22          | 22.7         |
| NHS hospital trusts represented<br>(including England, Northern Ireland, Scotland and Wales) | 69          | -            |

Question 1: If you see a pregnant woman with chronic hypertension who is currently taking either ACEIs or ARBs (e.g. at the beginning of pregnancy), how often would you ask her to stop taking them?

| Response                     | Number (97) | Percentage (%) |
|------------------------------|-------------|----------------|
| Always                       | 57          | 57.8           |
| Almost always                | 27          | 27.8           |
| About two thirds of the time | 1           | 1              |
| About half of the time       | 4           | 4.1            |
| About a third of the time    | 0           | 0              |
| Very rarely                  | 1           | 1              |
| Never                        | 3           | 3.1            |
| Missing                      | 4           | 4.1            |

Question 2: What do you usually use as your first line anti-hypertensive treatment(s) for women with chronic hypertension in pregnancy?

| Anti-hypertensive (non-exclusive) | Number (97) | Percentage (%) |
|-----------------------------------|-------------|----------------|
| Labetalol                         | 85          | 87.6           |
| Methyldopa                        | 29          | 29.9           |
| Nifedipine                        | 32          | 33.0           |
| Amlodipine                        | 2           | 2.1            |

Question 3: What additional anti-hypertensive medication do you use for treating women with chronic hypertension in pregnancy?

| Anti-hypertensive (non-exclusive) | Number (97) | Percentage (%) |
|-----------------------------------|-------------|----------------|
| Amlodipine                        | 37          | 38.1           |
| Atenolol                          | 2           | 2.1            |
| Doxazosin                         | 23          | 23.7           |
| Enalapril                         | 1           | 1.0            |
| Hydralazine (oral)                | 2           | 2.1            |
| Labetalol                         | 38          | 39.2           |
| Methyldopa                        | 60          | 61.9           |
| Metoprolol                        | 1           | 1.0            |
| Nifedipine                        | 79          | 81.4           |

Question 4: How frequently do you set a blood pressure target for women with chronic hypertension in pregnancy who need anti-hypertensive treatment (assuming no other co-morbidity) (mmHg)?

| Answer                                   | Number (97) | Percentage % |
|------------------------------------------|-------------|--------------|
| Always                                   | 36          | 37.1         |
| Almost always                            | 36          | 37.1         |
| About two thirds of the time             | 8           | 8.2          |
| About half of the time                   | 3           | 3.1          |
| About a third of the time                | 4           | 4.1          |
| Very rarely                              | 3           | 3.1          |
| Never                                    | 1           | 1.0          |
| Other                                    | 6           | 6.2          |
| In the guidelines but compliance unknown | 2           |              |
| Frequency not described                  | 4           |              |

Question 5: What blood pressure target do you usually set for pregnant women with chronic hypertension (assuming no other co-morbidity) (mmHg)?

| Systolic | Number (97) | Percentage % | Median (IQR1-IQR3) |
|----------|-------------|--------------|--------------------|
| 120      | 2           | 2.1          |                    |
| 125      | 0           | 0.0          |                    |
| 130      | 6           | 6.2          |                    |
| 135      | 2           | 2.1          |                    |
| 140      | 33          | 34.0         |                    |
| 145      | 0           | 0.0          |                    |
| 150      | 40          | 41.2         |                    |
| 155      | 1           | 1.0          |                    |
| 160      | 8           | 8.2          |                    |
| Missing  | 4           | 4.1          |                    |
| Median   |             |              | 150 (140-150)      |

| Diastolic | Number (97) | Percentage % | Median (IQR1-IQR3) |
|-----------|-------------|--------------|--------------------|
| 80        | 9           | 9.3          |                    |
| 85        | 7           | 7.2          |                    |
| 90        | 37          | 38.1         |                    |
| 95        | 8           | 8.2          |                    |
| 100       | 27          | 27.8         |                    |
| 110       | 3           | 3.1          |                    |
| Missing   | 5           | 5.2          |                    |
| Median    |             |              | 90 (90-100)        |

Question 6: How often do you prescribe Aspirin for women with chronic hypertension in pregnancy?

| Answer                       | Number (97) | Percentage % |
|------------------------------|-------------|--------------|
| Always                       | 53          | 54.6         |
| Almost always                | 36          | 37.1         |
| About two thirds of the time | 5           | 5.2          |
| About half of the time       | 2           | 2.1          |
| Very rarely                  | 1           | 1.0          |

Question 7: At what gestation do these women usually receive their first Aspirin prescription?

| Answer          | Number (97) | Percentage % |
|-----------------|-------------|--------------|
| Before 12 weeks | 41          | 42.3         |
| 12-15+6 weeks   | 52          | 53.6         |
| 16-19+6 weeks   | 1           | 1.0          |
| Missing answer  | 3           | 3.1          |

Question 8: For a woman with uncomplicated chronic hypertension in pregnancy (i.e. no additional risk factors), how many routine fetal growth scans do they receive (excluding nuchal and anomaly scans)?

| Additional scans | Number (97) | Percentage % | Median (IQR1-IQR3) |
|------------------|-------------|--------------|--------------------|
| None             | 4           | 4.1          |                    |
| 1                | 12          | 12.4         |                    |
| 2                | 23          | 23.7         |                    |
| 3                | 37          | 38.1         |                    |
| 4                | 21          | 21.6         |                    |
| >4               | 1           | 1.0          |                    |
|                  |             |              | 3 (2-3)            |

Question 9: When do you usually plan birth for women with chronic hypertension whose blood pressure is controlled below 160/110?

| Gestation                | Number (97) | Percentage (%) | Median (IQR1-IQR3) |
|--------------------------|-------------|----------------|--------------------|
| Before 34 weeks          | 3           | 3.1            |                    |
| 34-34+6 weeks            | 2           | 2.1            |                    |
| 35-35+6 weeks            | 2           | 2.1            |                    |
| 36-36+6 weeks            | 4           | 4.1            |                    |
| 37-37+6 weeks            | 27          | 27.8           |                    |
| 38-38+6 weeks            | 36          | 37.1           |                    |
| 39-39+6 weeks            | 41          | 42.3           |                    |
| 40-41 weeks              | 28          | 28.9           |                    |
| Await spontaneous labour | 5           | 5.2            |                    |
| Other – individualised   | 4           | 4.2            |                    |
|                          |             |                | 38.5<br>(37-39)    |

Question 10: Involving pregnant women who have chronic hypertension in their pregnancy and birth planning is an important part of the consultation?

| Sentiment         | Number (97) | Percentage (%) |
|-------------------|-------------|----------------|
| Agree Strongly    | 79          | 81.4           |
| Agree             | 15          | 15.5           |
| Slightly Agree    | 2           | 2.1            |
| Slightly disagree | 0           | 0.0            |
| Disagree          | 0           | 0.0            |
| Disagree Strongly | 1           | 1.0            |

Question 11: If you wish, can you give an example of how you enable women to be actively involved in their care?

| Themes                                 | Number (47) | Percentage % |
|----------------------------------------|-------------|--------------|
| Total responses                        | 47          |              |
| SDM in the following areas             |             |              |
| • Home BP                              | 10          | 21           |
| • Monitoring BP                        | 6           | 12.8         |
| • Anti-hypertensives                   | 5           | 10.6         |
| • Planning birth (induction of labour) | 17          | 36           |
| • Organisation of care                 | 4           | 8.5          |
| Discussing risks and benefits          | 2           | 4.3          |
| How to identify pre-eclampsia          | 2           | 4.3          |

Question 12: In your maternity unit what term/s best describes the antenatal care provided to most women with chronic hypertension?

| Care provision                                                           | Number (97) | Percentage %  |
|--------------------------------------------------------------------------|-------------|---------------|
| Named consultant-led general antenatal clinic (maternal medicine clinic) | 63<br>(7)   | 64.9<br>(7.2) |
| Consultant-led specialist hypertension in pregnancy clinic               | 25          | 25.8          |
| Multi-disciplinary clinic with additional medical professional           | 20          | 20.6          |
| Consultant obstetrician and midwife antenatal clinic                     | 15          | 15.5          |
| Shared-care GP/ obstetrician/ midwife                                    | 7           | 7.2           |
| Specialist midwifery care (e.g. medical conditions team)                 | 6           | 6.2           |
| Hospital midwifery care                                                  | 1           | 1.0           |
| Community based midwifery care                                           | 4           | 4.1           |
| Day assessment unit                                                      | 2           | 2.1           |

Question 13: In your maternity unit when do the pregnant women with chronic hypertension usually first get seen by an obstetrician?

| <b>Gestation</b> | <b>Number (97)</b> | <b>Percentage %</b> |
|------------------|--------------------|---------------------|
| Before 12 weeks  | 24                 | 24.7                |
| 12-15+6 weeks    | 63                 | 64.9                |
| 16-27+6 weeks    | 9                  | 9.3                 |
| Missing data     | 1                  | 1.0                 |

Question 14: Do you or someone in your unit specifically collect and analyse the outcomes of women with chronic hypertension in pregnancy annually?

| <b>Response</b> | <b>Number (97)</b> | <b>Percentage (%)</b> |
|-----------------|--------------------|-----------------------|
| Yes             | 24                 | 24.7                  |
| No              | 67                 | 69.0                  |
| Unsure          | 4                  | 4.1                   |
| Some aspects    | 2                  | 2.0                   |
