# Supplementary material for: Implementation of national antenatal hypertension guidelines: a multicentre multiple methods study
Source: PubMed Central journal article supplement (PMC7590365; doi:10.1136/bmjopen-2019-035762), 2020-10-23
Supplement: bmjopen-2019-035762supp003.pdf [file bmjopen-2019-035762supp003.pdf]

## Supplementary file 3

Maternal demographics of women observed, interviewed and included for case-note review.

Women interviewed are a subset of those observed. Case-notes identified for review are a different cohort of women.

| <b>Women demographics</b> | <b>Observed n=28 (%)</b> | <b>Interviewed n=18 (%)</b> | <b>Case-notes n=55 (%)</b> |
|---------------------------|--------------------------|-----------------------------|----------------------------|
| <b>Ethnicity</b>          |                          |                             |                            |
| White British             | 9 (32.0)                 | 7 (39.0)                    | 15 (27.3)                  |
| White Other               | 6 (21.0)                 | 4 (22.0)                    | 8 (14.5)                   |
| Black                     | 9 (32.0)                 | 5 (28.0)                    | 18 (32.7)                  |
| Asian                     | 2 (7.0)                  | 1 (5.5)                     | 8 (14.5)                   |
| Any other                 | 2 (7.0)                  | 1 (5.5)                     | 6 (10.9)                   |
| <b>Parity at booking</b>  |                          |                             |                            |
| 0                         | 9 (32.0)                 | 7 (39.0)                    | 15 (27.3)                  |
| 1                         | 11(39.0)                 | 7 (39.0)                    | 21 (38.2)                  |
| 2                         | 7 (25.0)                 | 4 (22.0)                    | 10 (18.2)                  |
| 3                         | 0 (0.0)                  | 0 (0.0)                     | 6 (10.9)                   |
| 4                         | 0 (0.0)                  | 0 (0.0)                     | 2 (3.6)                    |
| 5                         | 1 (4.0)                  | 0 (0.0)                     | 1 (1.8)                    |
| <b>Age</b>                |                          |                             |                            |
| 20-34                     | 17 (61.0)                | 11 (61.0)                   | 23 (41.8)                  |
| 35-39                     | 7 (25.0)                 | 5 (28.0)                    | 21 (38.9)                  |
| 40-44                     | 4 (14.0)                 | 2 (11.0)                    | 11 (20.4)                  |
| <b>BMI</b>                |                          |                             |                            |
| <18.5                     | 0 (0.0)                  | 0 (0.0)                     | 1/52 (1.9)                 |
| 18.5-24.9                 | 7 (25)                   | 6 (33.3)                    | 13/52 (25.0)               |
| 25-29.9                   | 10 (36)                  | 6 (33.3)                    | 13/52 (25.0)               |
| 30-34.9                   | 9 (32)                   | 5 (28.0)                    | 11/52 (21.2)               |
| 35-39.0                   | 2 (7)                    | 1 (5.5)                     | 6/52 (11.5)                |
| >40.0                     | 0 (0)                    | 0 (0.0)                     | 8/52 (7.7)                 |
