# Supplementary material for: Implementation of national antenatal hypertension guidelines: a multicentre multiple methods study
Source: PubMed Central journal article supplement (PMC7590365; doi:10.1136/bmjopen-2019-035762), 2020-10-23
Supplement: bmjopen-2019-035762supp004.pdf [file bmjopen-2019-035762supp004.pdf]

## Supplementary file 4

## Pregnancy and birth outcomes – Case notes review

| <b>Outcomes</b>                           | <b>Case notes review<br/>Nominator/denominator (%)</b> |
|-------------------------------------------|--------------------------------------------------------|
| Women with episode of severe hypertension | 25/55 (45.5)                                           |
| 1 <sup>st</sup> trimester episode         | 2/40 (5.0)                                             |
| 2 <sup>nd</sup> trimester episode         | 13/40 (32.5)                                           |
| 3 <sup>rd</sup> trimester episode         | 25/40 (62.5)                                           |
| Birth weight - median<br>(IQR1 – IQR3)    | 2927.5<br>(2592.5 - 3200)                              |
| Admission to NNU                          | 9/55 (16.4)                                            |
