# Supplementary material for: Implementation of national antenatal hypertension guidelines: a multicentre multiple methods study
Source: PubMed Central journal article supplement (PMC7590365; doi:10.1136/bmjopen-2019-035762), 2020-10-23
Supplement: bmjopen-2019-035762supp005.pdf [file bmjopen-2019-035762supp005.pdf]

## Supplementary file 5

Target blood pressure setting and prescribing practices per Trust – as derived from case-note review

|                                                 | <b>Hospital Trust 1<br/>n=29 (%)</b> | <b>Hospital Trust 2<br/>n=13 (%)</b> | <b>Hospital Trust 3<br/>n=13 (%)</b> |
|-------------------------------------------------|--------------------------------------|--------------------------------------|--------------------------------------|
| <b>Target BP documented<br/>&lt;150/100mmHg</b> | 20/26 (77.0)                         | 3/13 (23.0)                          | 5 (38.0)                             |
| <b>Labetalol</b>                                | 12/26 (46.0)                         | 7/12 (58.3)                          | 9/11 (82.0)                          |
| <b>Nifedipine</b>                               | 9/26 (34.5)                          | 0/12 (0.0)                           | 0/11 (0.0)                           |
| <b>Methyldopa</b>                               | 3/26 (11.5)                          | 4/12 (33.3)                          | 1/11 (9.0)                           |
| <b>Other</b>                                    | 2/26 (8.0)                           | 1/12 (8.3)                           | 1/11 (9.0)                           |
